# Supplementary material for: Interfacial engineering of polypropylene/graphene nanocomposites: improvement of graphene dispersion by using tryptophan as a stabilizer
Source: Royal Society of Chemistry journal article supplement (doi:10.1039/c3ra47112h), 2014-01-01
Supplement: c3ra47112h.pdf [file c3ra47112h.pdf]

## Supplementary Information

### **Interfacial engineering of polypropylene/graphene nanocomposites: Improvement of graphene dispersion by using tryptophan as stabilizer**

Feng You<sup>a</sup>, Dongrui Wang<sup>a</sup>, Xinxin Li<sup>a</sup>, Meijing Liu<sup>a</sup>, Guo-Hua Hu<sup>b\*</sup> and Zhi-Min Dang<sup>a\*</sup>

<sup>a</sup> Department of Polymer Science and Engineering, School of Chemistry and Biological Engineering,  
University of Science and Technology Beijing, Beijing, 100083, P. R. China.

Corresponding author: email [dangzm@ustb.edu.cn](mailto:dangzm@ustb.edu.cn)

<sup>b</sup> CNRS-Université de Lorraine, Laboratoire Réactions et Génie des Procédés, UMR 7274, ENSIC, 1  
rue Grandville, BP 20451, Nancy, F-54000, France.

Corresponding author: email [guo-hua.hu@univ-lorraine.fr](mailto:guo-hua.hu@univ-lorraine.fr)

## 1. The two parallel experiments of binary-phase system

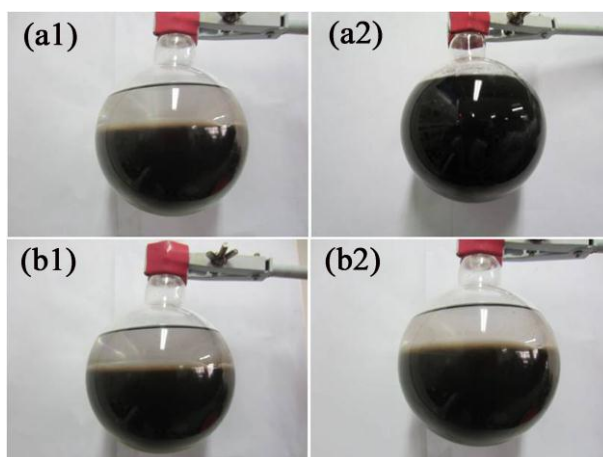

Figure S1. The binary phase of xylene (upper) and water (lower): (a1) and (a2) are the graphene/water and MAPP/xylene binary system before and after heating at 95 °C for 8 h; (b1) and (b2) are the *f*-graphene/water and PP/xylene binary system before and after heating at 95 °C for 8 h. PP or MAPP is in xylene phase, graphene or *f*-graphene is in water phase before heating.

## 2. X-ray photoelectron spectroscopy (XPS) of various samples

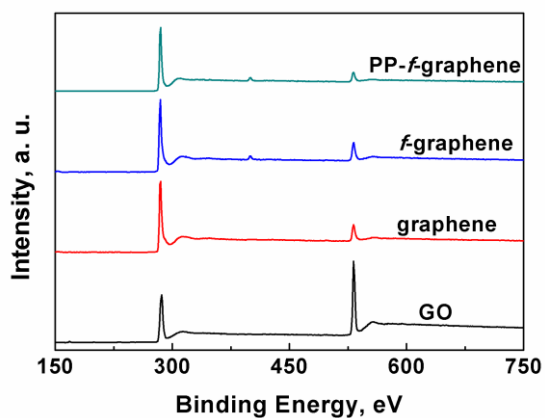

Figure S2. XPS spectra of GO, graphene, *f*-graphene and PP-*f*-graphene.

X-ray photoelectron spectroscopy (XPS) of each sample was recorded on a Kratos AXIS ULTRADLD system (Japan), using monochromatic Al K $\alpha$  radiation as exciting source.
